# Supplementary material
Source: publisher figshare collection journal article supplement (https://acs.figshare.com/ndownloader/files/22763387)
Supplement: Supplementary file 1 [file 22763387]

## Supporting Information

### Electronic Level Structure of Silver-Intercalated Cytosine Nanowires

Natalie Fardian-Melamed<sup>1</sup>, Liat Katrivas<sup>2</sup>, Gennady Eidelstein<sup>2</sup>, Dvir Rotem<sup>1</sup>, Alexander Kotlyar<sup>2\*</sup>, and Danny Porath<sup>1\*</sup>

<sup>1</sup>Institute of Chemistry and Center for Nanoscience and Nanotechnology, The Hebrew University of Jerusalem, Jerusalem 91904, Israel

<sup>2</sup>Department of Biochemistry and Molecular Biology, George S. Wise Faculty of Life Sciences, and The Center of Nanoscience and Nanotechnology, Tel Aviv University, Ramat Aviv, Tel Aviv 69978, Israel

\*email: [s2shak@tauex.ac.il](mailto:s2shak@tauex.ac.il); [danny.porath@mail.huji.ac.il](mailto:danny.porath@mail.huji.ac.il)

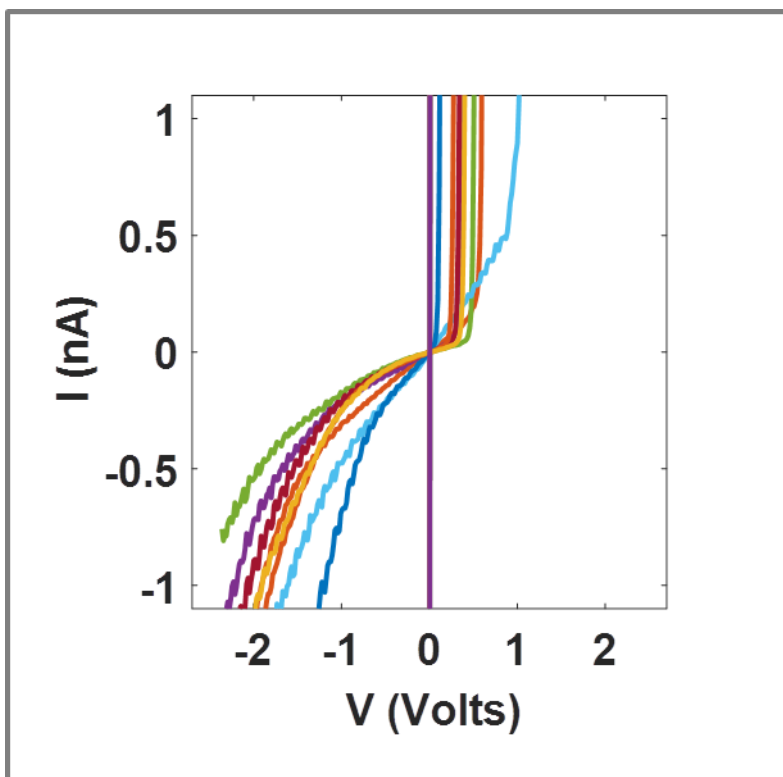

Figure S1: I-V curves measured at 77 K on the cystamine-modified flame annealed gold surrounding the C-Ring molecules.

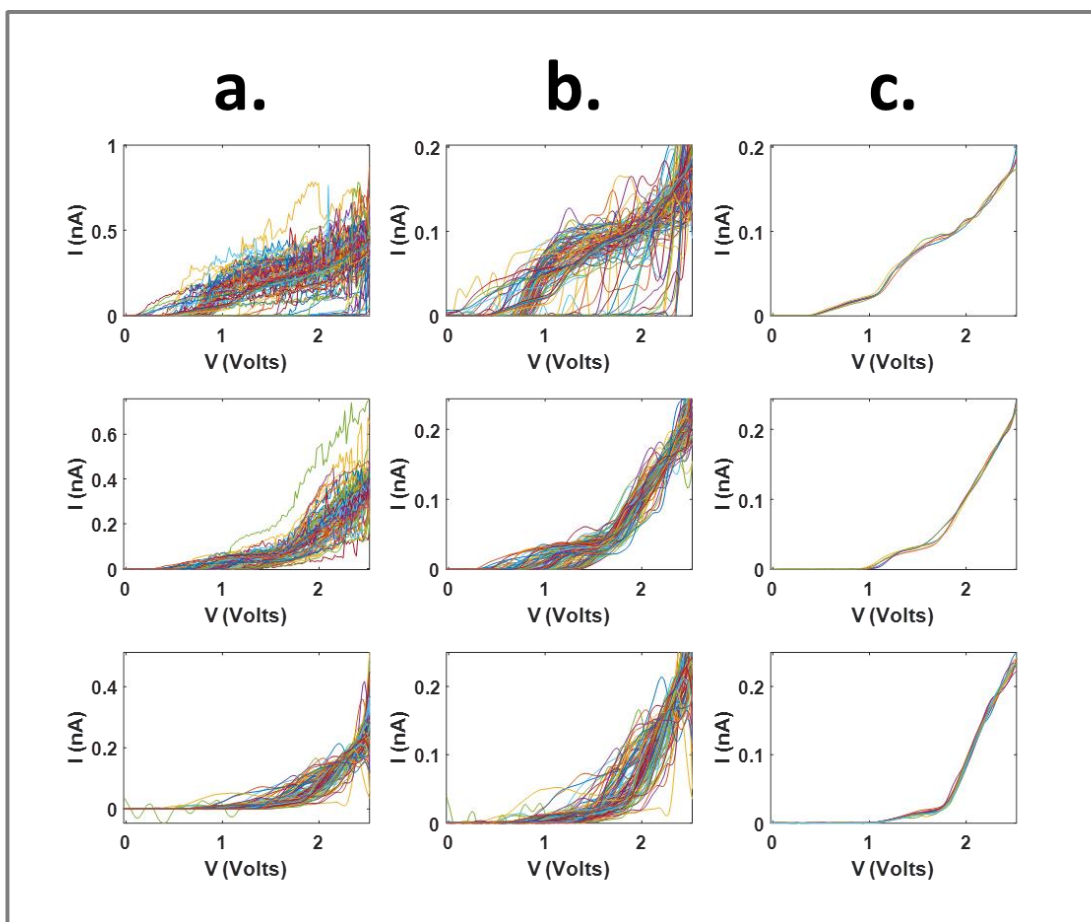

**Figure S2: Processing the I-V measurements. a. Three sets of measurement points' I-V curves, measured at 77 K. Each set consists of 100 raw data I-V curves. b. Filtered (Savitzky-Golay) and normalized I-V curves from a.. c. Recurring I-V curves from b.**
